# Supplementary material for: Trade-Off between Root Efficiency and Root Size Is Associated with Yield Performance of Soybean under Different Water and Phosphorus Levels
Source: MDPI journal article supplement (doi:10.3390/agriculture11060481), 2021-05-24
Supplement: s1 [file s1]

Archive with 1 entries (1 files):
- agriculture-1177271-supplementary.pdf
