# Supplementary material for: Trade-Off between Root Efficiency and Root Size Is Associated with Yield Performance of Soybean under Different Water and Phosphorus Levels
Source: MDPI journal article supplement (doi:10.3390/agriculture11060481), 2021-05-24
Supplement: s1 [file s1 › agriculture-1177271-supplementary.pdf]

## Supplementary Data

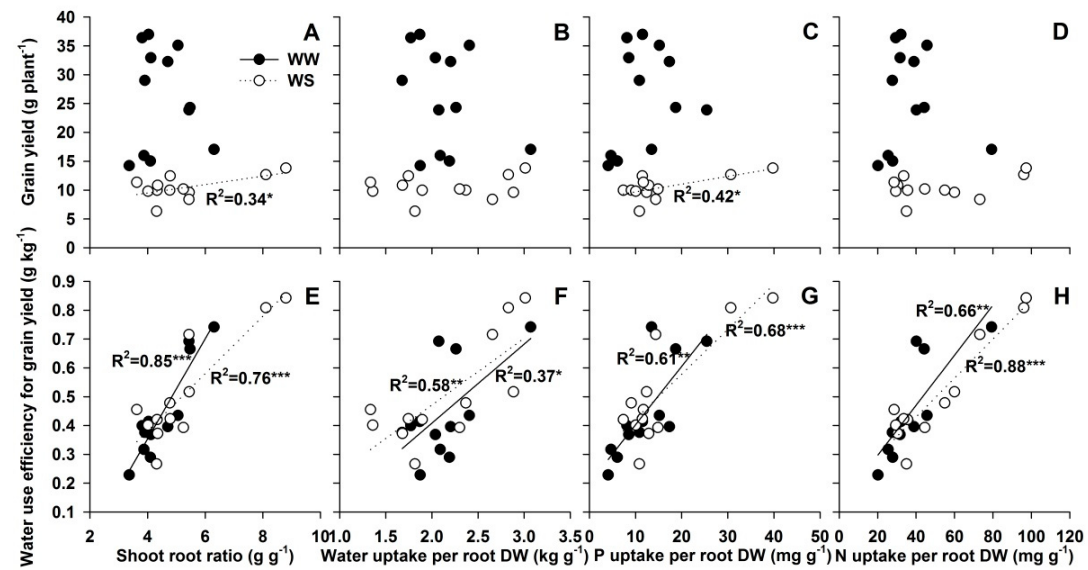

**Figure 1.** The relationship between grain yield (g plant<sup>-1</sup>) and (A) water uptake per root dry weight (DW, kg g<sup>-1</sup>DW), (B) shoot root ratio (g g<sup>-1</sup>) and (C) P uptake per root dry weight (DW, mg P g<sup>-1</sup>DW); and (D) N uptake per root DW (mg N g<sup>-1</sup>DW), water use efficiency for grain yield (g L<sup>-1</sup>) and (E) water uptake per root dry weight (DW, kg g<sup>-1</sup>DW), (F) shoot root ratio (g g<sup>-1</sup>) and (G) P uptake per root dry weight (DW, mg g<sup>-1</sup>DW); and (H) N uptake per root DW (mg P g<sup>-1</sup>DW) of four soybean genotypes under two water treatments and three P levels.

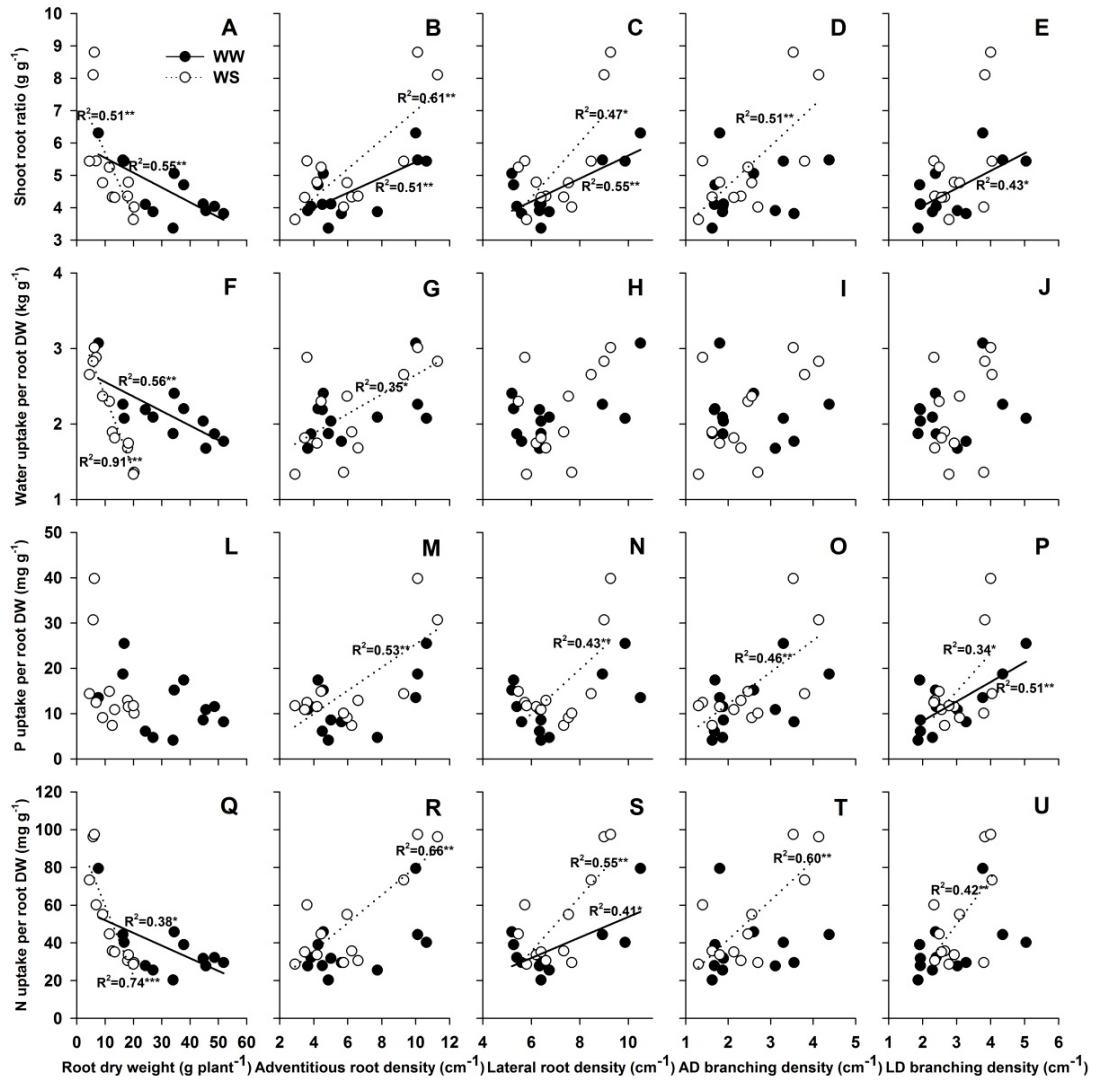

**Figure 2.** The relationship between root dry weight (g plant<sup>-1</sup>), adventitious root (AD) density (cm<sup>-1</sup>), lateral root (LD) density (cm<sup>-1</sup>), adventitious root branching density (cm<sup>-1</sup>), lateral root branching density (cm<sup>-1</sup>) and (A–E) shoot root ratio (g g<sup>-1</sup>), (F–J) water uptake per root dry weight (kg g<sup>-1</sup>), (L–P) P uptake per root DW (mg g<sup>-1</sup>), and (Q–U) N uptake per root DW (mg g<sup>-1</sup>) of four soybean genotypes under two water treatments and three P levels.
